# Supplementary material for: Intraperitoneal activation of myeloid cells clears ascites and reveals IL27-dependent regression of metastatic ovarian cancer
Source: PubMed Central journal article supplement (PMC11230450; doi:10.1101/2024.06.25.600597), 2024-06-29
Supplement: NIHPP2024.06.25.600597v1-supplement-1.pdf [file NIHPP2024.06.25.600597v1-supplement-1.pdf]

# Supplemental Data Figures 1

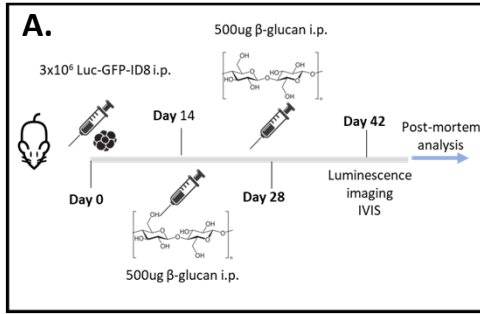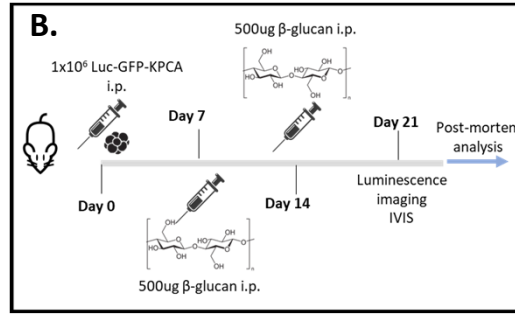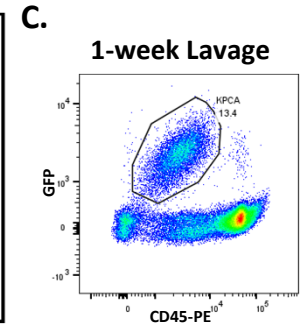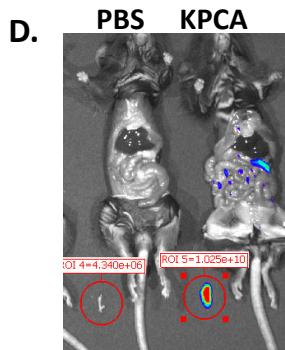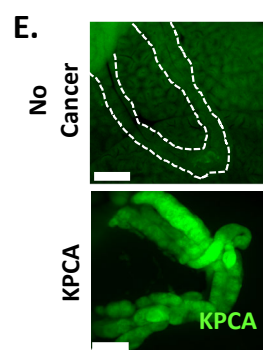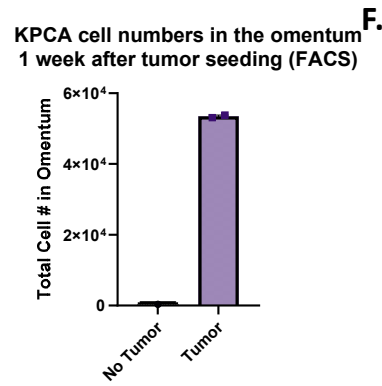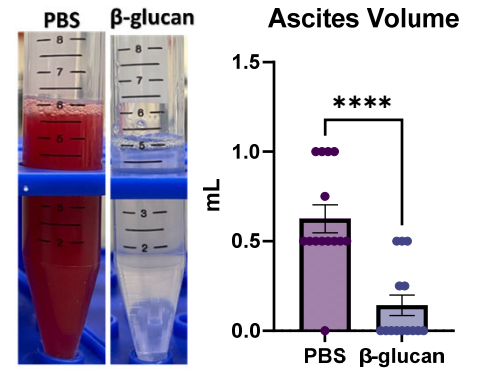

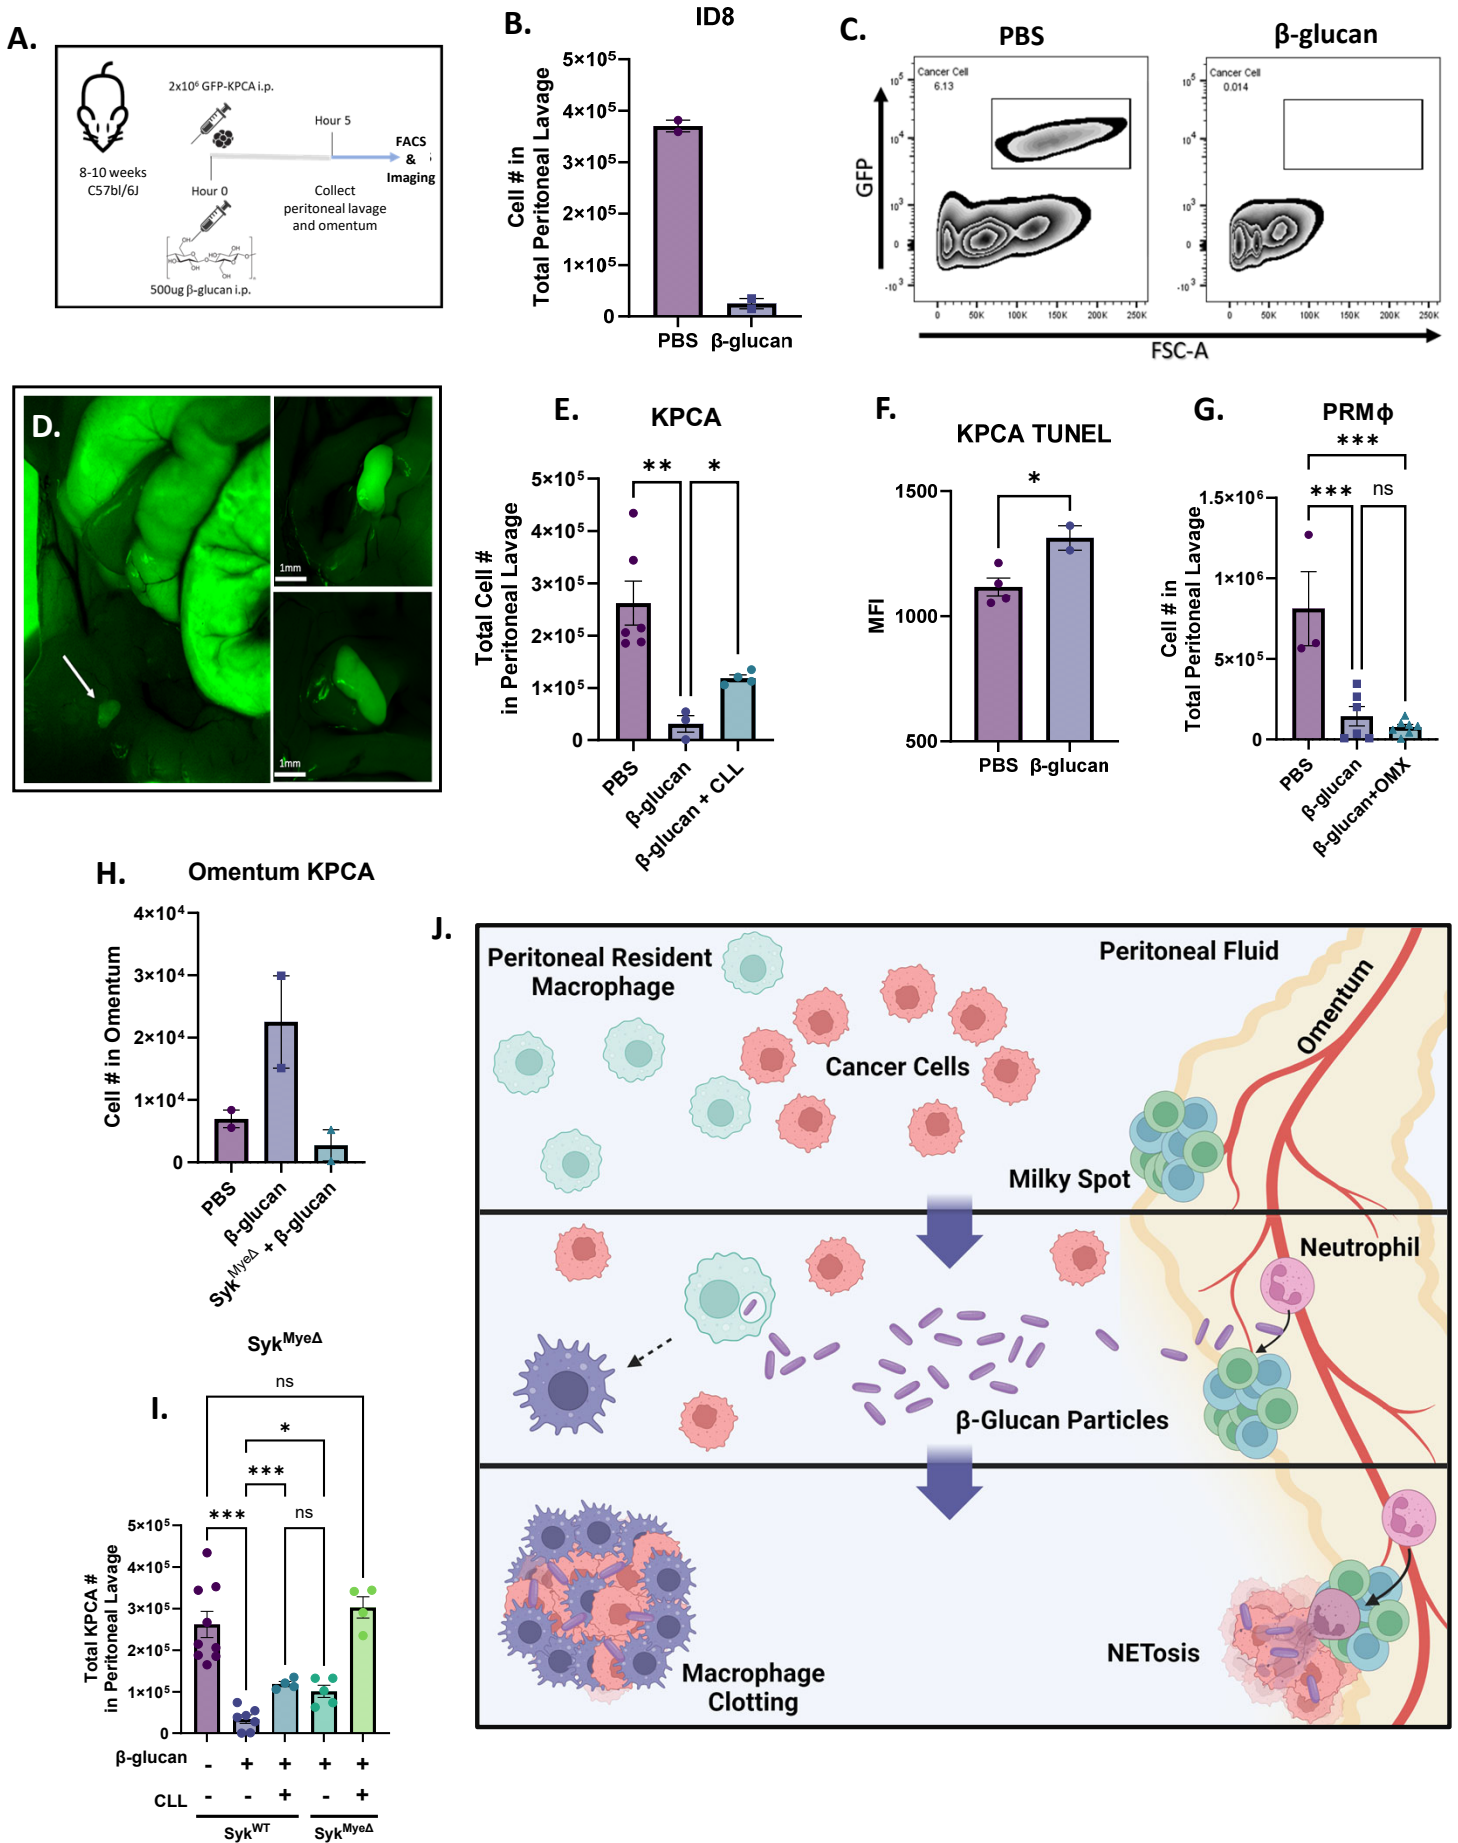

# Supplemental Data Figures 3

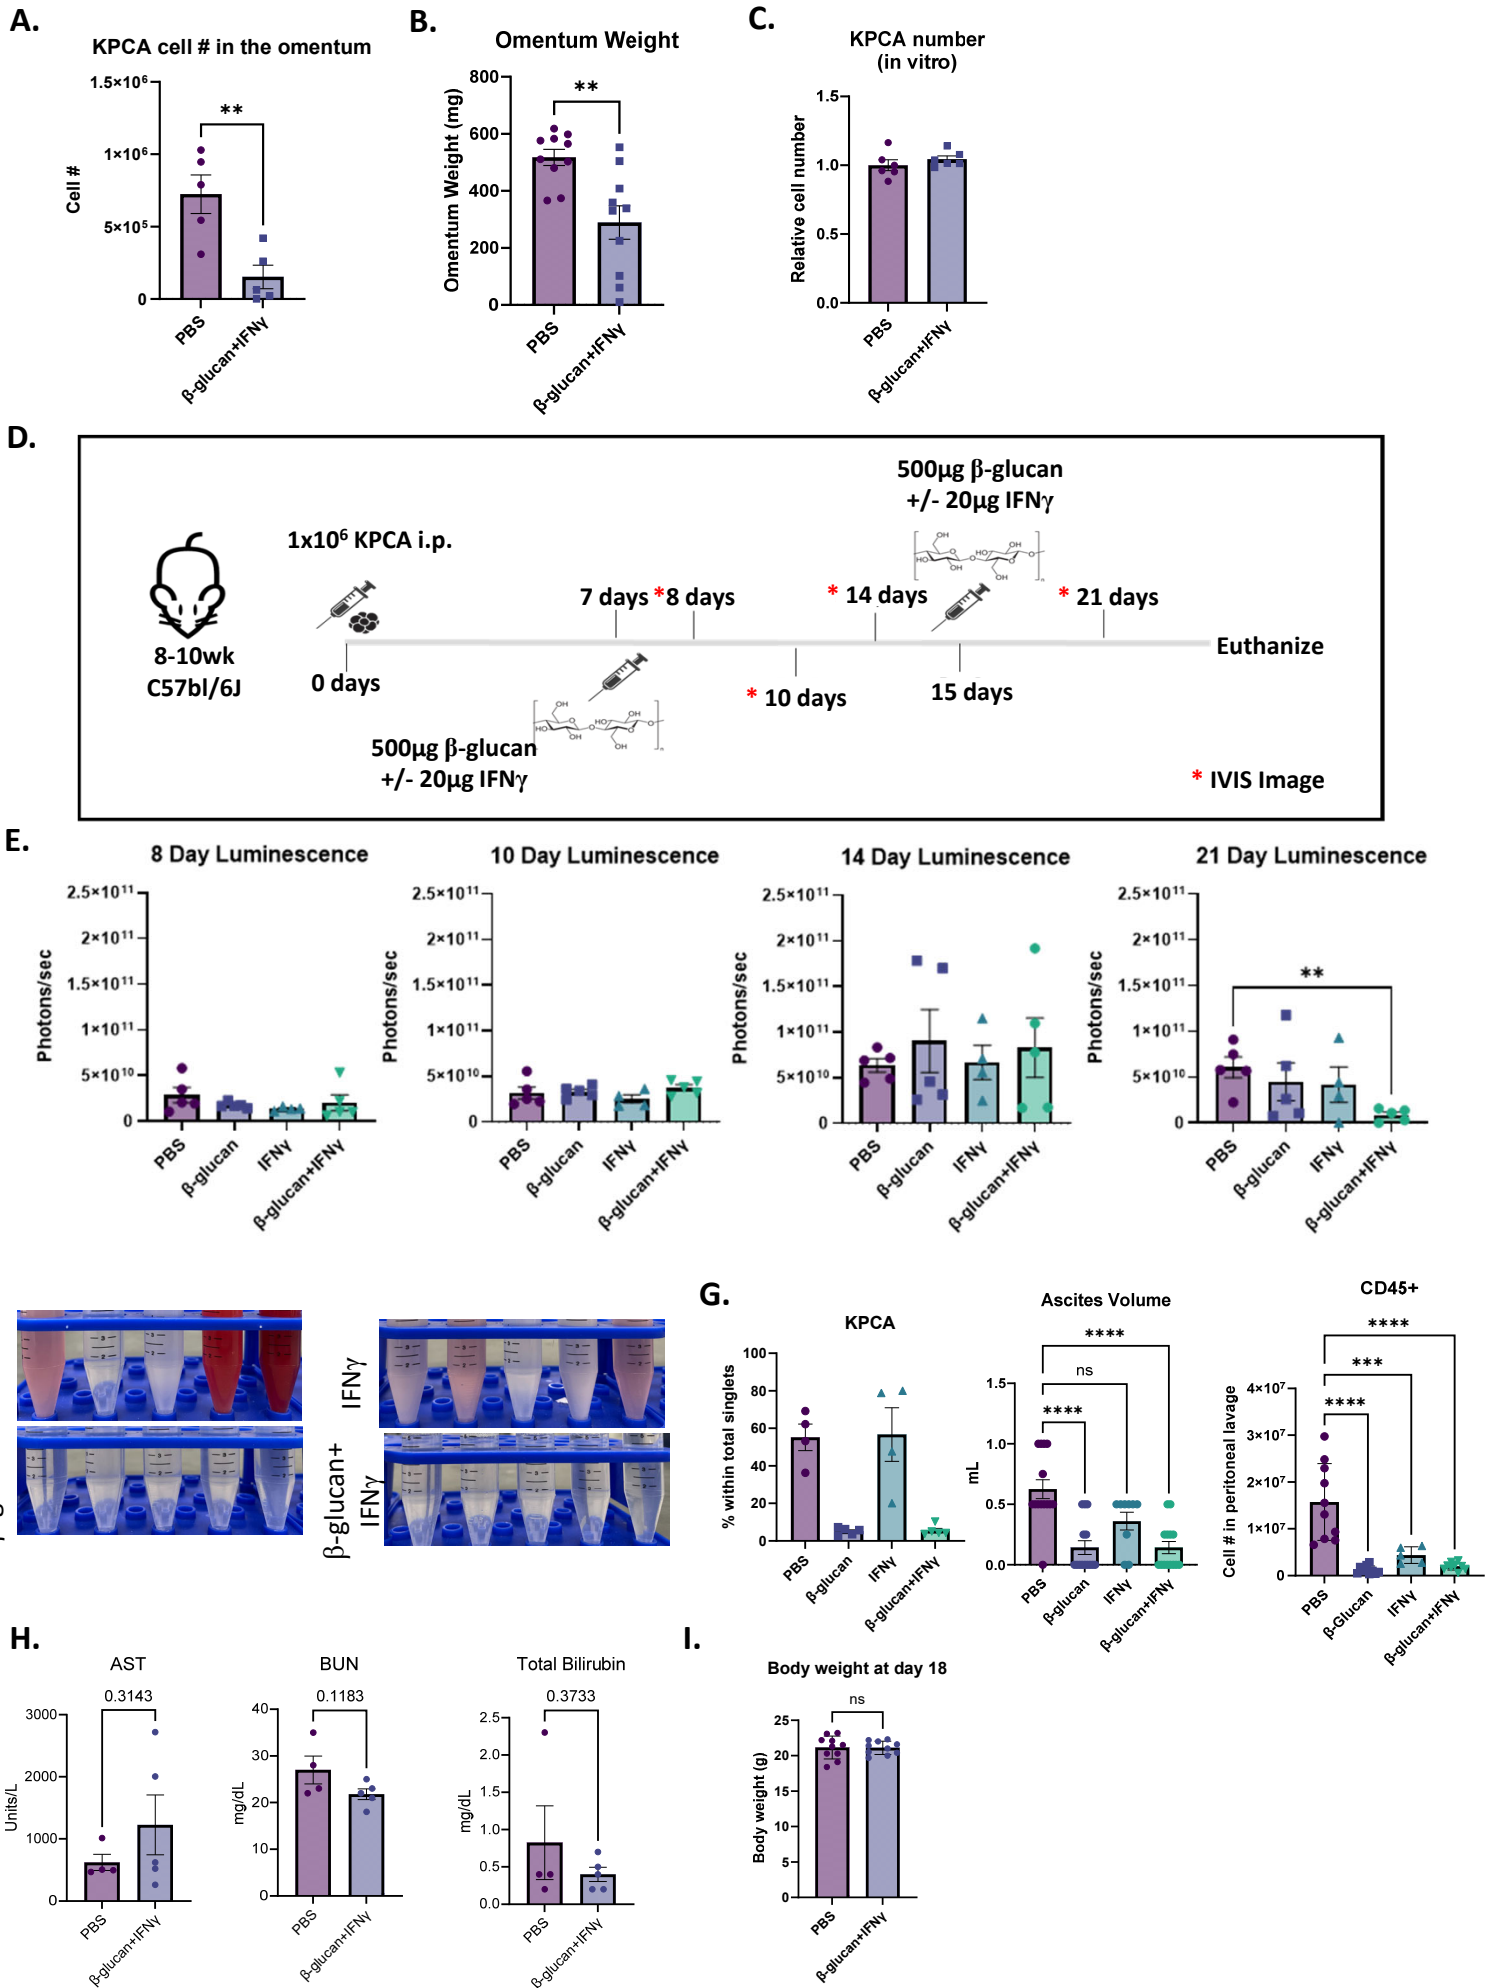

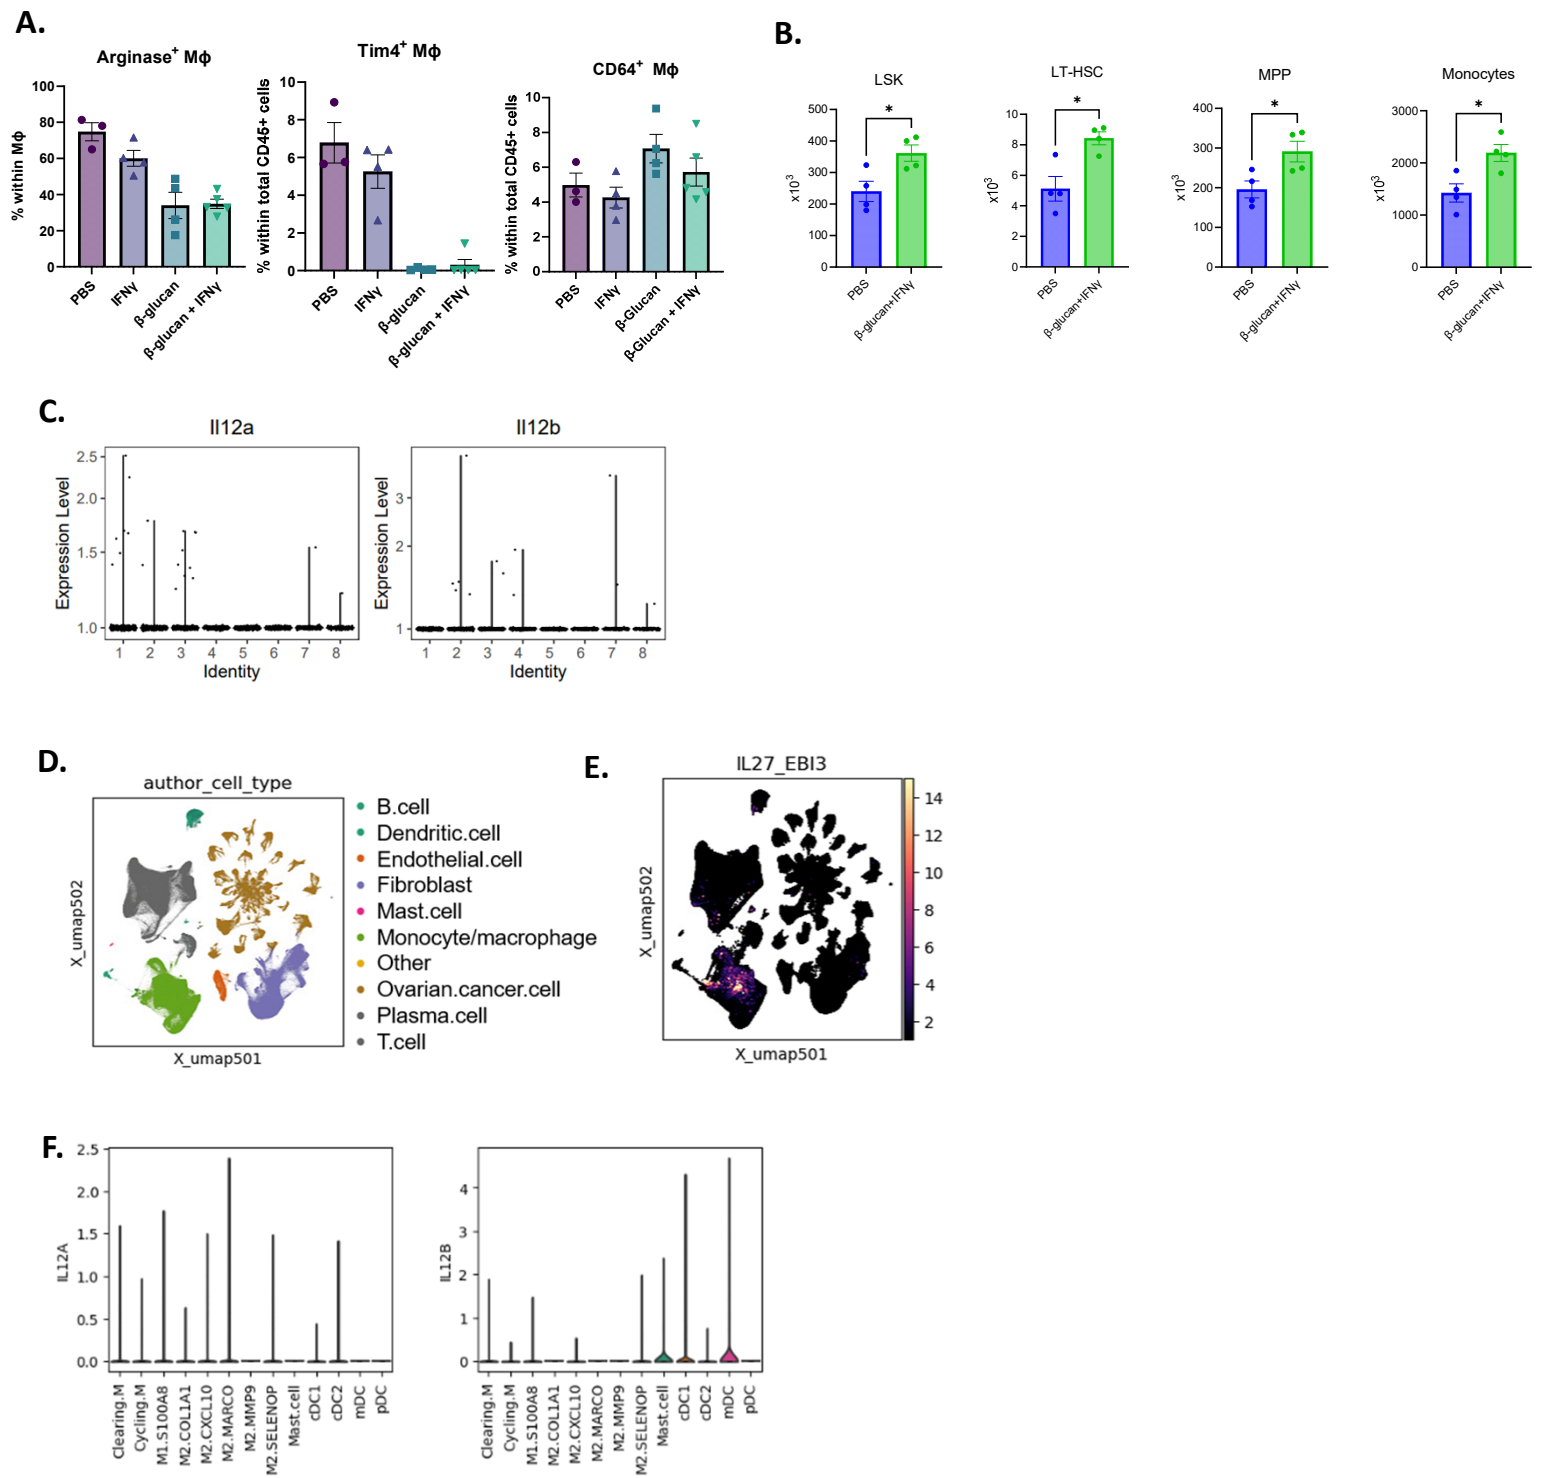

# Supplemental Data Figures

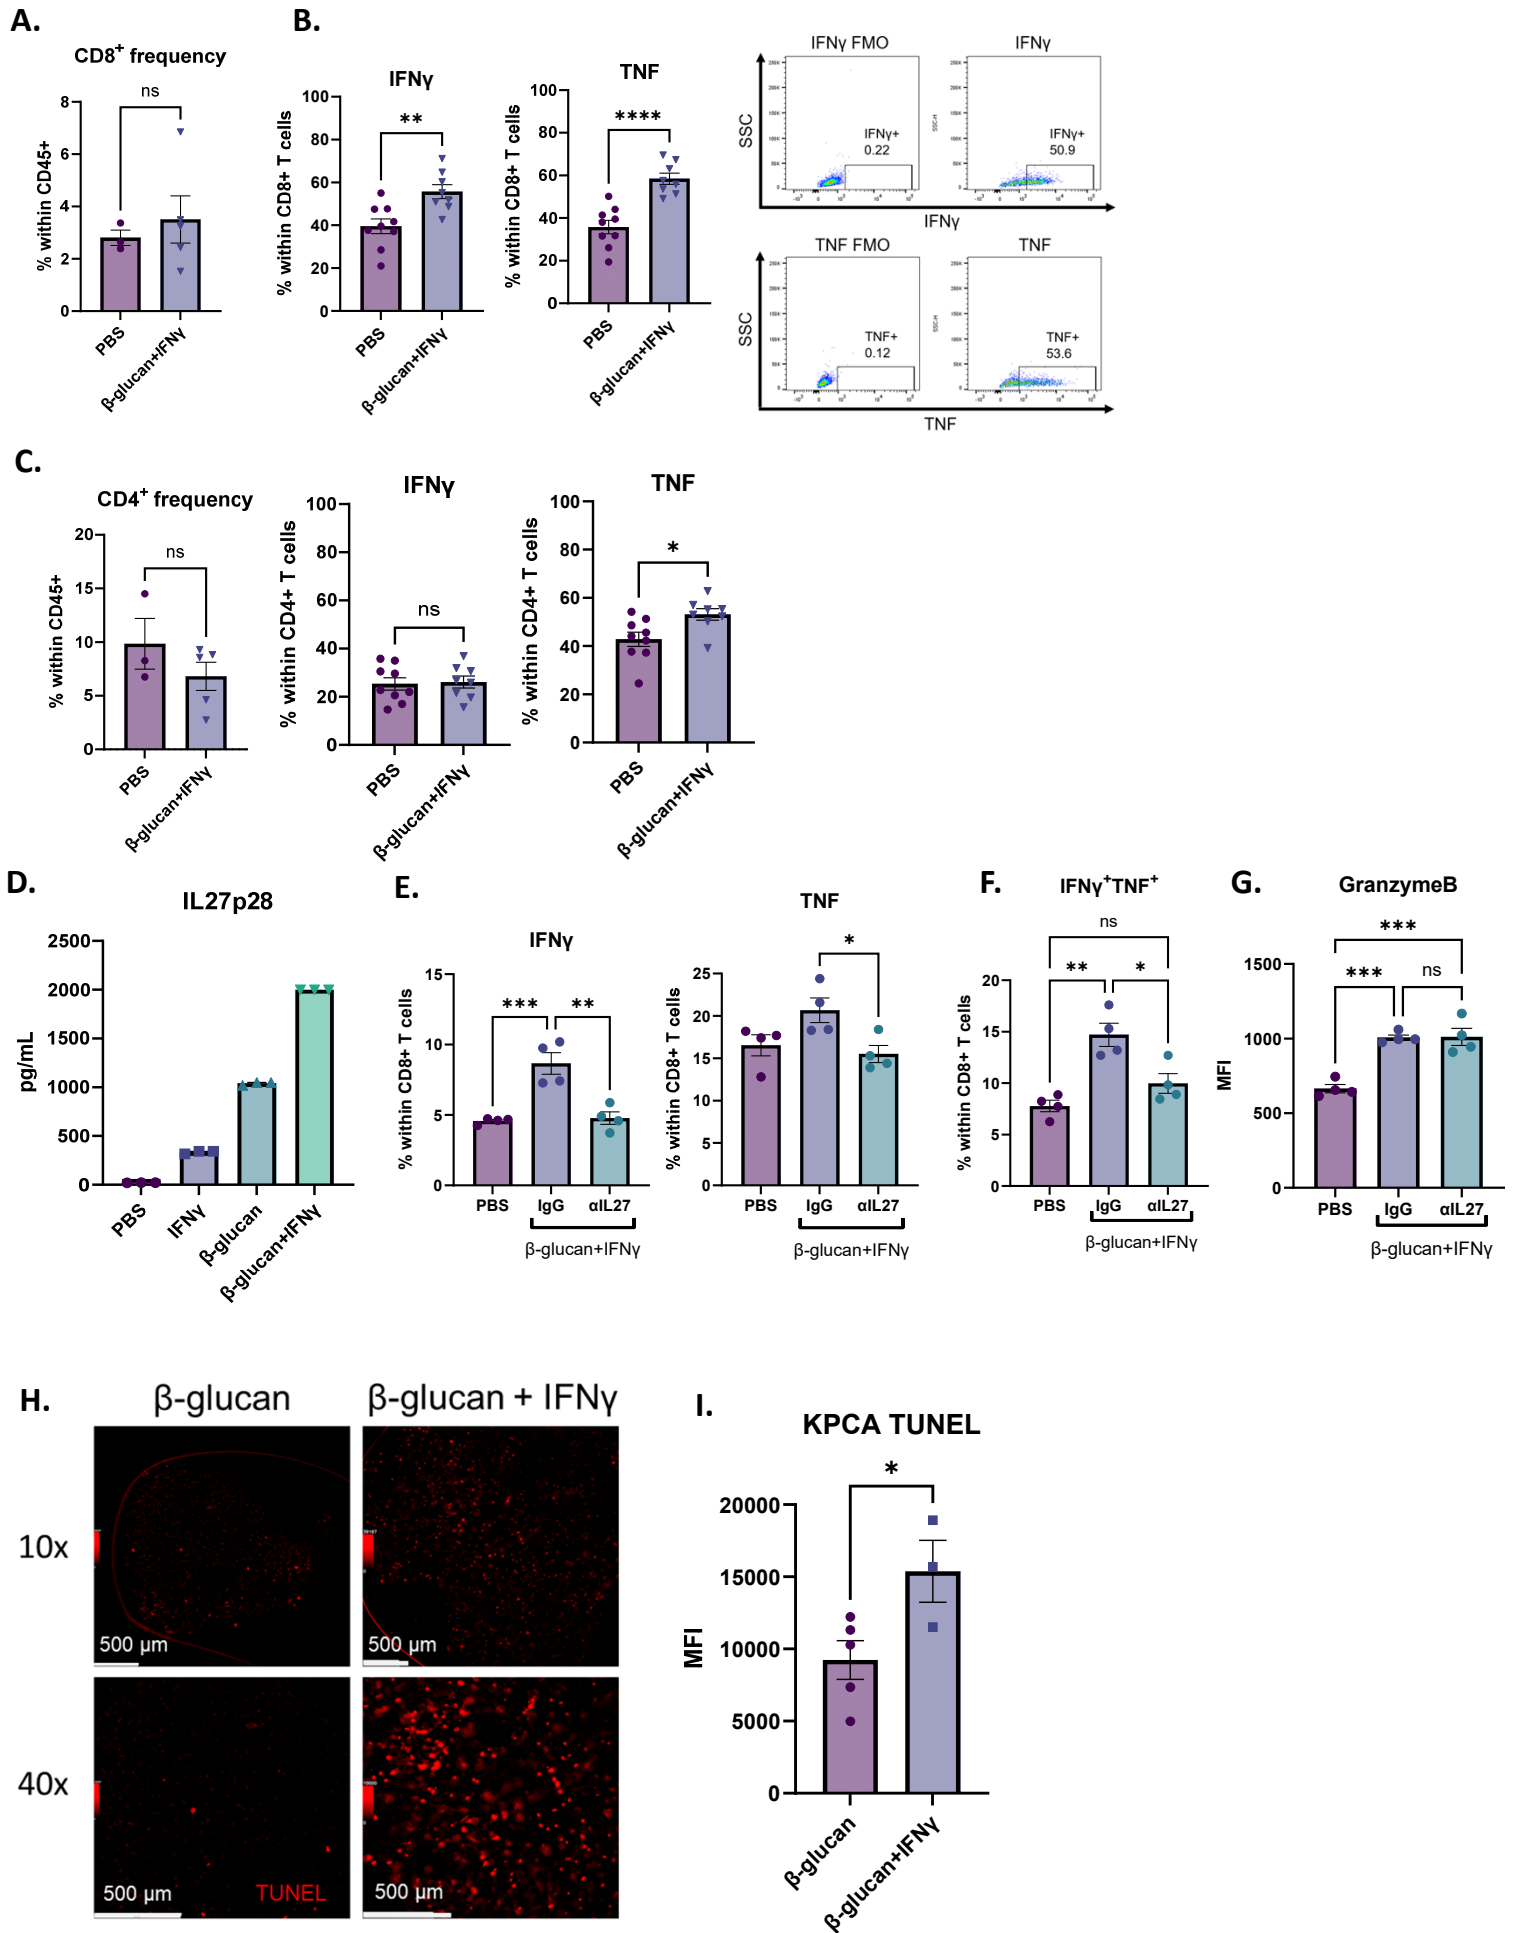

#### Figure 4. BI enriched IL27+ macrophages in omentum tumors

(A) Whole body bioluminescence signals of PBS or CLL-treated mice treated with BI and control mice. (B) A UMAP plot of monocyte/M $\Phi$  clusters in omentum tumors. (C) Top expressed genes in all monocyte/M $\Phi$  clusters. (D) Frequencies of eight identified monocyte/M $\Phi$  clusters in omentum tumors. (E) Slingshot trajectory analysis from the origin (Cluster 5) through three independent pathways (red arrows). (F) qPCR analysis of Cluster 2-specific genes in monocyte-derived M $\Phi$ s treated with PBS or BI. (G) Top upregulated IPA cytokine regulators in Clusters 1 and 2. (H) *Il27* and *Ebi3* co-expression heatmap in monocyte/M $\Phi$  clusters. (I) *Il27* expression in monocyte-derived M $\Phi$ s treated with PBS or BI analyzed by qPCR. (J) UMAP monocyte/M $\Phi$  clusters and (K) *IL27* and *EBI3* co-expression in tumors from human OvCa patients. (L) Overall survival analysis in late stage OvCa patients (stage III and IV) with high and low co-expression of *IL27-EBI3*. Student's t test and log rank test were used. \* $p < 0.05$ ; \*\* $p < 0.01$ ; \*\*\*\* $p < 0.0001$ . Error bars are standard errors of the mean.

#### Figure 5. IL27 contributes to BI treatment by activating T cells and is specifically secreted by BI-stimulated M $\Phi$ s.

(A) Bioluminescence signals of omentum tumors and (B) mesentery metastasis scores from mice injected with IgG or  $\alpha$ IL27 treated with BI as well as PBS-treated control mice. (C) Mean fluorescent intensity (MFI) of IFN $\gamma$  and TNF in CD8 $^+$  T cells in omentum tumors from control or BI treated mice analyzed by flow cytometry. (D) ELISA quantification of IL27 heterodimer in supernatant from BMDM stimulated with PBS, IFN $\gamma$ ,  $\beta$ -glucan, or BI. (E) ELISA quantification of IL27 heterodimer in supernatant from WT-, Syk<sup>Mye $\Delta$</sup> , Dectin-1 KO, and IFN $\gamma$ R KO BMDM cultured with PBS or BI. (F) IFN $\gamma$  and TNF MFI of CD8 $^+$  T cells cocultured with M $\Phi$  pretreated with PBS or BI in the presence of  $\alpha$ IL27 antibody or control IgG. Student's t test and One-way ANOVA were used. \* $p < 0.05$ ; \*\* $p < 0.01$ ; \*\*\* $p < 0.001$ ; \*\*\*\* $p < 0.0001$ . Error bars are standard errors of the mean.

#### Figure 6. BI extends overall survival in both chemoresistant and chemo-sensitive models and dramatically enhances chemotherapy response in the chemo-sensitive model.

(A) Survival curves of KPCA tumor-bearing mice treated with PBS, carboplatin, BI, or BI+carboplatin as indicated. The numbers of mice are PBS  $n=14$ , carboplatin  $n=10$ , BI  $n=20$ , BI+carboplatin  $n=15$ . The graph is a combination of three independent experiments. (B) survival curves of BPPNM tumor-bearing mice treated with BI and carboplatin as indicated. The numbers of mice are PBS  $n=14$ , carboplatin  $n=20$ , BI  $n=15$ , BI+carboplatin  $n=14$ . The graph is a combination of three independent experiments. Log-rank test was used.

#### Supplementary Figure 1.

Treatment timelines of (A) ID8 and (B) KPCA tumors treated with  $\beta$ -glucan. (C) Representative flow plot identifying GFP+CD45- KPCA cells in the peritoneal lavage of mice 1 week after tumor seeding. (D) Representative image and quantification of compartmental bioluminescent imaging. The omentum is removed from the cavity; signals (red circle) are obtained separately from the rest of the peritoneal cavity (non-omentum signal). (E) Representative fluorescent images of the omentum and KPCA numbers in the omentum of mice 1 week after KPCA cell injection. Scale bar is 2.5 mm. (F) Representative images of ascites and calculated changes in ascites volumes from PBS- or  $\beta$ -glucan-treated mice. student's t test was used. \*\*\*\* $p < 0.0001$ . Error bars are standard errors of the mean.

## Supplementary Figure 2.

(A) Acute cancer cell capture timeline. (B) Quantification of ID8 cells in the peritoneal lavage of mice 5 hours post  $\beta$ -glucan treatment. (C) Representative flow plots of GFP+ KPCA cells disappearing from the peritoneal lavage 5 hours after intraperitoneal  $\beta$ -glucan administration. (D) Representative *in situ* images of peritoneal clots formed in the peritoneal cavity after  $\beta$ -glucan treatment. These clots contain GFP+ KPCA cancer cells. (E) Quantification of KPCA cells in peritoneal lavage as determined by flow cytometry in control or CLL-pretreated mice 5 hours after intraperitoneal  $\beta$ -glucan administration. (F) MFI of TUNEL staining in KPCA cells in the clots  $\beta$ -glucan treated mice and peritoneal lavage from PBS-treated mice, which do not form clots. (G) Quantification of peritoneal resident macrophages (PRM $\Phi$ s) in the peritoneal lavage of control or omentectomized (OMX) mice after  $\beta$ -glucan administration. (H) Quantification by flow of GFP+ KPCA cells in the omentum of Syk<sup>WT</sup> and Syk<sup>Mye $\Delta$</sup>  mice treated with  $\beta$ -glucan. (I) Quantification of KPCA cells in peritoneal lavage in Syk<sup>WT</sup> and Syk<sup>Mye $\Delta$</sup>  mice 5 hours post indicated treatment with PBS,  $\beta$ -glucan, or CLL. (J) Graphical representation of two mechanisms of cancer cell capture following intraperitoneal injection of  $\beta$ -glucan. One-way ANOVA and student's t test were used. \*p<0.05; \*\*p<0.01; \*\*\*p<0.001. Error bars are standard errors of the mean.

## Supplementary Figure 3.

(A) KPCA cell numbers in the omentum evaluated by flow cytometry and (B) Omentum tumor weight in PBS- or BI-treated mice. (C) Quantification of KPCA numbers 48 hours following PBS and BI treatment *in vitro*. Student's t test was used. (D) Treatment and longitudinal imaging timeline in PBS-, IFN $\gamma$ -,  $\beta$ -glucan-, and BI-treated mice. (E) Quantification of bioluminescence signals in mice tracked longitudinally from day 8 to day 21 after tumor seeding. (F) Representative images of ascites accumulation and (G) quantification of KPCA cells and CD45+ cells and ascites volumes based on the peritoneal lavage of mice treated with PBS, IFN $\gamma$ ,  $\beta$ -glucan, and BI 21 days after tumor seeding. (H) IDEXX clinical chemistry analyses of sera from PBS- or BI-treated mice. (I) Body weight of PBS- or BI-treated mice 18 days after tumor cell seeding. Student's t test and One-way ANOVA were used \*\*p<0.01, \*\*\*p<0.001, \*\*\*\*p<0.0001. Error bars are standard errors of the mean.

## Supplementary Figure 4.

(A) Quantification of frequencies of Arginase+ M $\Phi$ s, Tim4+ M $\Phi$ s, and CD64+ M $\Phi$ s in omentum tumors treated as indicated and determined by flow cytometry. (B) Number of progenitor cells and monocytes in the bone marrow of mice 1 week after PBS or BI treatment. (C) Expression of *Il12a* and *Il12b* in monocyte/M $\Phi$  clusters pooled from mice treated with PBS,  $\beta$ -glucan, IFN $\gamma$ , or BI. (D) UMAP plot of immune cells and co-expression of *IL27-EBI3* in human OvCa patient tumors. (E) Expression of *IL12A* and *IL12B* in each myeloid cell subclusters from human OvCa tumors. Student's t test was used. \*p<0.05. Error bars are standard errors of the mean.

## Supplementary Figure 5.

(A) Quantification of frequencies and (B) activation of CD8<sup>+</sup> T cells in omentum tumors from PBS- or BI-treated mice and flow cytometry plots of TNF- or IFN $\gamma$ -stained samples, including fluorescence minus one (FMO) plots used to identify positive populations. (C) Quantification of frequencies and activation of CD4<sup>+</sup> T cells in omentum tumors from PBS- or BI-treated mice. (D) ELISA quantification of IL30 (IL27p28) in supernatant from BMDM cultured with PBS, IFN $\gamma$ ,  $\beta$ -glucan and BI. Frequencies of (E) IFN $\gamma$ + or TNF+, (F) IFN $\gamma$ +TNF+ CD8<sup>+</sup> T cells, and (G)

Granzyme B MFI of CD8<sup>+</sup> T cells cocultured with MΦ pretreated with PBS or BI in the presence of αLL27 antibody or control IgG. (H) Representative TUNEL staining in β-glucan- or BI-induced clots. (I) FACS quantification TUNEL MFI in GFP<sup>+</sup> KPCA Cells. Student's t test and One-way ANOVA were used. \*p<0.05; \*\*p<0.01; \*\*\*p<0.001; \*\*\*\*p<0.0001. Error bars are standard errors of the mean.
